# Supplementary material for: Validation of Acetylcholinesterase Inhibition Machine Learning Models for Multiple Species
Source: PubMed Central journal article supplement — Chem Res Toxicol. 2023 Feb 3;36(2):188–201. doi: 10.1021/acs.chemrestox.2c00283 (PMC9945174; doi:10.1021/acs.chemrestox.2c00283), 2023-02-03
Supplement: tx2c00283_si_001.pdf [file tx2c00283_si_001.pdf]

## SUPPORTING INFORMATION

### Validation of Acetylcholinesterase Inhibition Machine Learning Models for Multiple Species

Patricia A. Vignaux\*, Thomas R. Lane, Fabio Urbina, Jacob Gerlach, Ana C. Puhl, Scott H. Snyder, and Sean Ekins\*

Collaborations Pharmaceuticals, Inc., 840 Main Campus Drive, Lab 3510, Raleigh, NC 27606, USA.

\*To whom correspondence should be addressed. E-mail [patricia@collaborationspharma.com](mailto:patricia@collaborationspharma.com) and [sean@collaborationspharma.com](mailto:sean@collaborationspharma.com) Phone: 215-687-1320

#### Table of Contents

|                                                                                                                                                                                                                                                    |    |
|----------------------------------------------------------------------------------------------------------------------------------------------------------------------------------------------------------------------------------------------------|----|
| Figure S1. t-SNE Comparison of Training Sets for AChE Classification Models for Seven Different Species.....                                                                                                                                       | S2 |
| Figure S2. Conjugate synthesis papers in the eel test set compared to the potency of their parent compounds.....                                                                                                                                   | S3 |
| Figure S3. t-SNE plot showing comparative chemical spaces of human and eel continuous datasets.....                                                                                                                                                | S4 |
| Figure S4. t-SNE plot showing comparative chemical spaces of the KEMI library with the dataset of the human AChE classification model and the dataset of the Extended Human Classification model supplemented with the Tox21 AChE Screen data..... | S5 |
| Figure S5. Dose-response of eight compounds from the Compounds of Emerging Concern List on human AChE.....                                                                                                                                         | S6 |
| Figure S6. MegaAChE website for prediction of AChE in multiple species.....                                                                                                                                                                        | S7 |
| Table S1. Internal 5-Fold cross validation statistics of Extended Human Classification model and 100 $\mu$ M activity threshold. Human AChE training set: 3560 active/10,382 total compounds.....                                                  | S8 |
| Table S2. Predicted hits from CompTox libraries against the Extended Human Classification model, sorted by AD score.....                                                                                                                           | S9 |

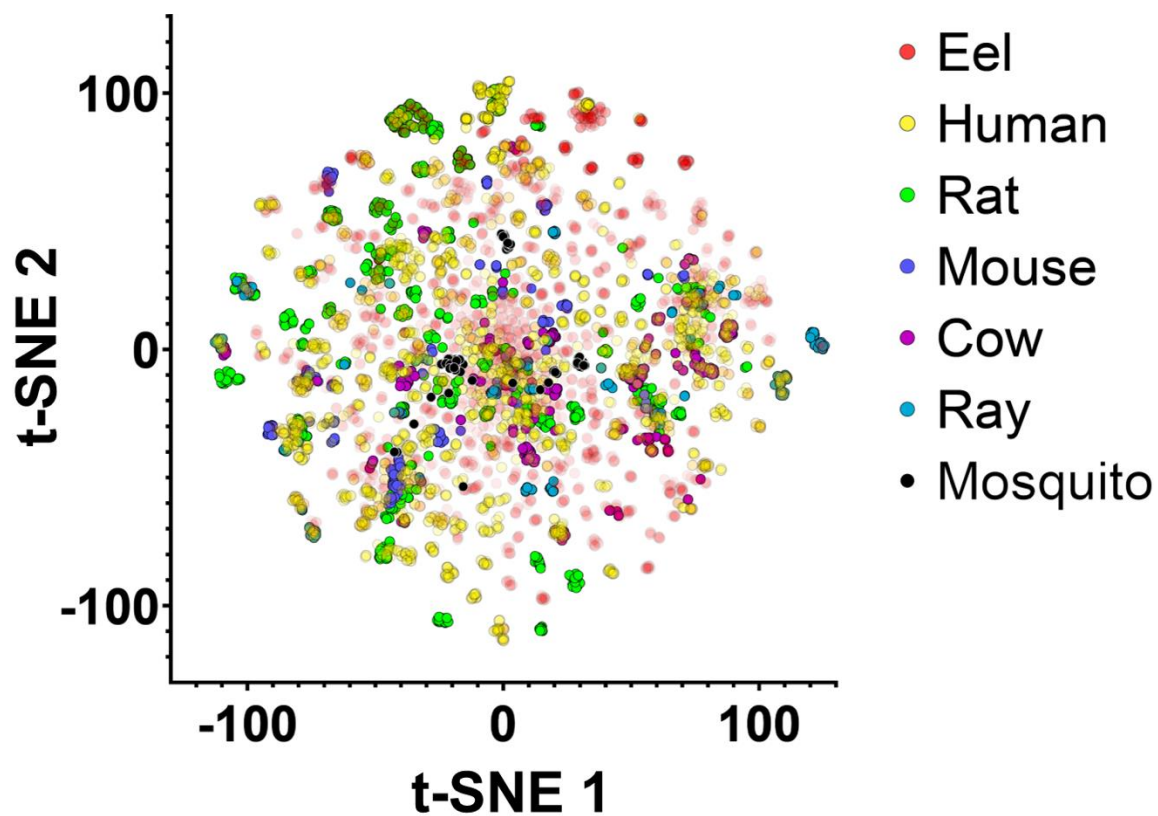

**Figure S1.** t-SNE Comparison of Training Sets for AChE Classification Models for Seven Different Species. The chemical space represented by condensing the ECFP6 fingerprints of the 10748 molecules used to build the classification models shows extensive overlap between the either the human or eel datasets and the other five species.

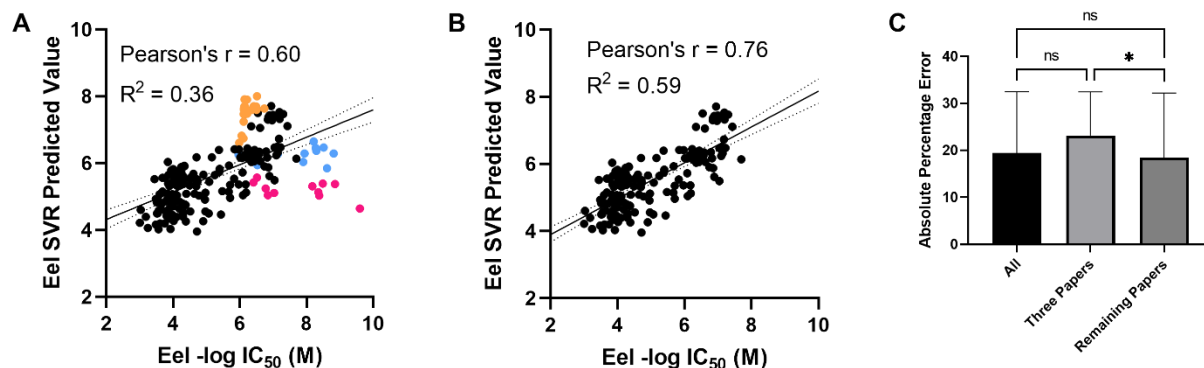

**Figure S2.** Conjugate synthesis papers in the eel test set compared to the potency of their parent compounds. A) Three Papers. Three publications in the eel test set that show notable divergence between measured IC<sub>50</sub> values and those predicted by the model. Orange molecules are brominated phenylacetic acid/tacrine hybrids from Cheng et al. 2018<sup>64</sup>, blue compounds are 3-aminocumarin-N-benzylpyridinium conjugates from Khunnawutmanotham et al. 2018<sup>65</sup>, and magenta compounds are ligustrazine derivatives from Wu et al. 2018<sup>66</sup>. \*Ligustrazine was shown to be not active in human AChE, but is not present in eel model. B) Remaining Set. Removal of these Three Papers from the eel test set increases the correlation between the measured and predicted -log(M) IC<sub>50</sub> values. Pearson Correlation and Linear regression performed in GraphPad Prism 9.4.1, Slope = 0.53, Y-intercept = 2.83. C) Comparison of the Absolute Percentage Error of the compounds in the complete eel test set, the compounds from the selected Three Papers, and the compounds in the Remaining Set when predicted with the eel SVR model. P value = 0.0170.

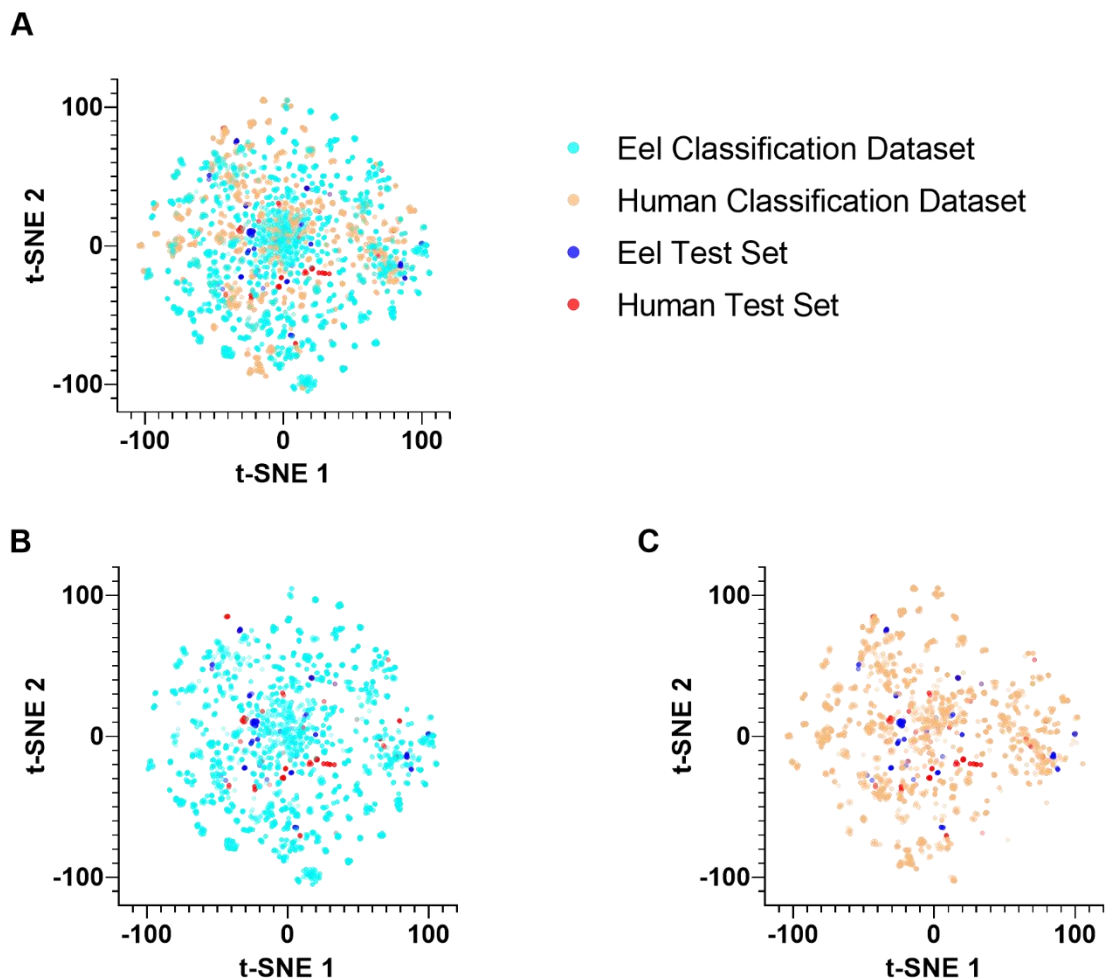

**Figure S3.** t-SNE plot showing comparative chemical spaces of human and eel continuous datasets. A) Human Test Set and Eel Test Set within the chemical spaces of both the Human and Eel Continuous datasets. B) Both Test Sets compared to Human dataset. C) Both test sets compared to Eel dataset.

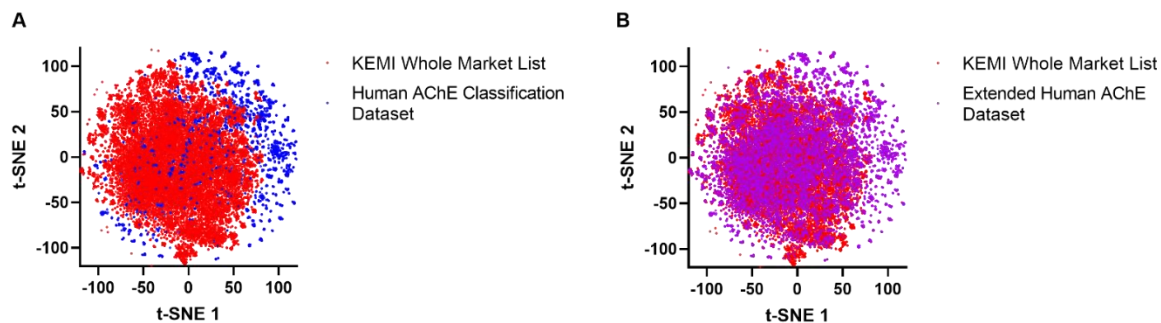

**Figure S4.** t-SNE plot showing comparative chemical spaces of the KEMI library with A) The dataset of the human AChE classification model and B) the dataset of the Extended Human Classification model supplemented with the Tox21 AChE Screen data.

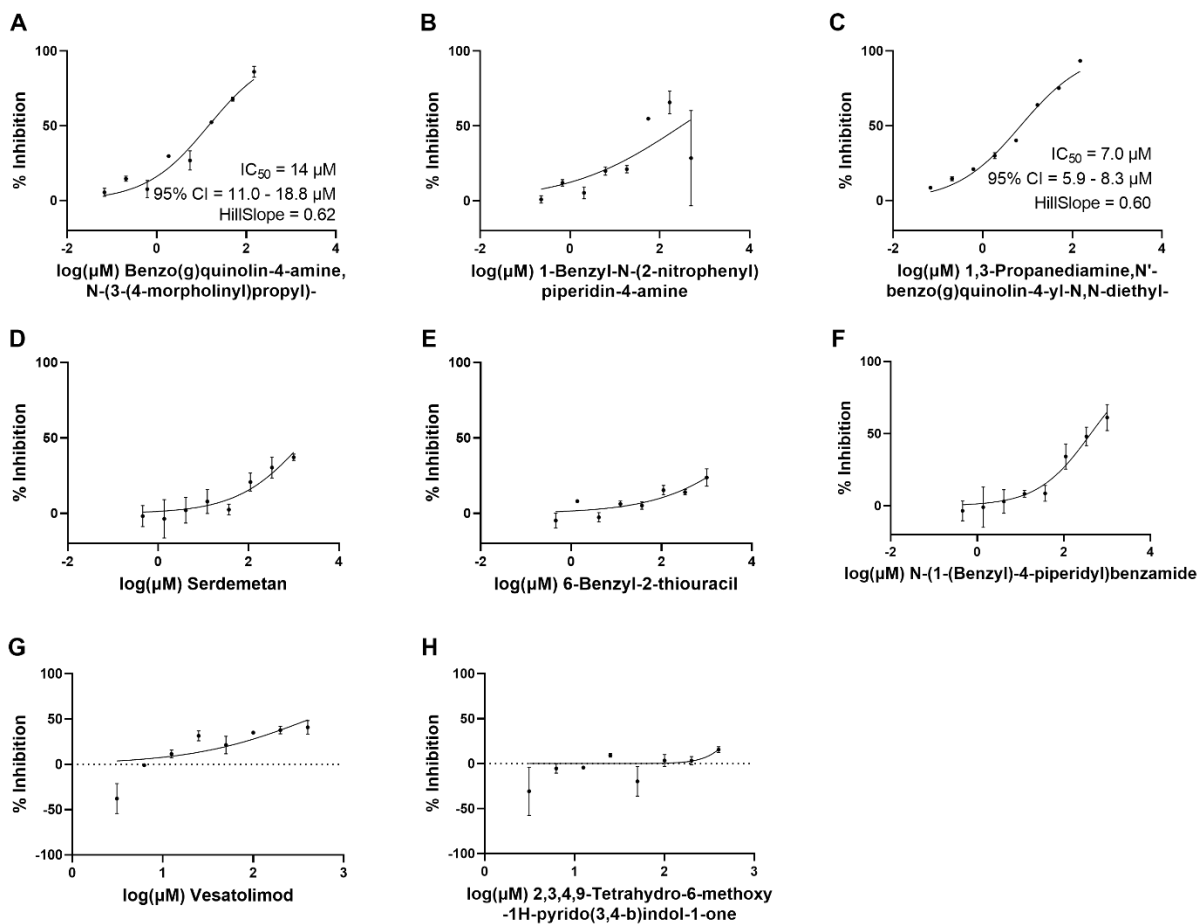

**Figure S5.** Dose-response of eight compounds from the Compounds of Emerging Concern List on human AChE. Compounds diluted in 1:3 (A-F) or 1:2 (G-H) dilution series in technical triplicate. Curves represent  $\log(\text{inhibitor})$  vs. response with variable slope (4 parameters, top and bottom constrained to 0 and 100%) generated in GraphPad Prism 9.4.1. Error bars represent standard deviation and are only visible when they exceed the size of the point.

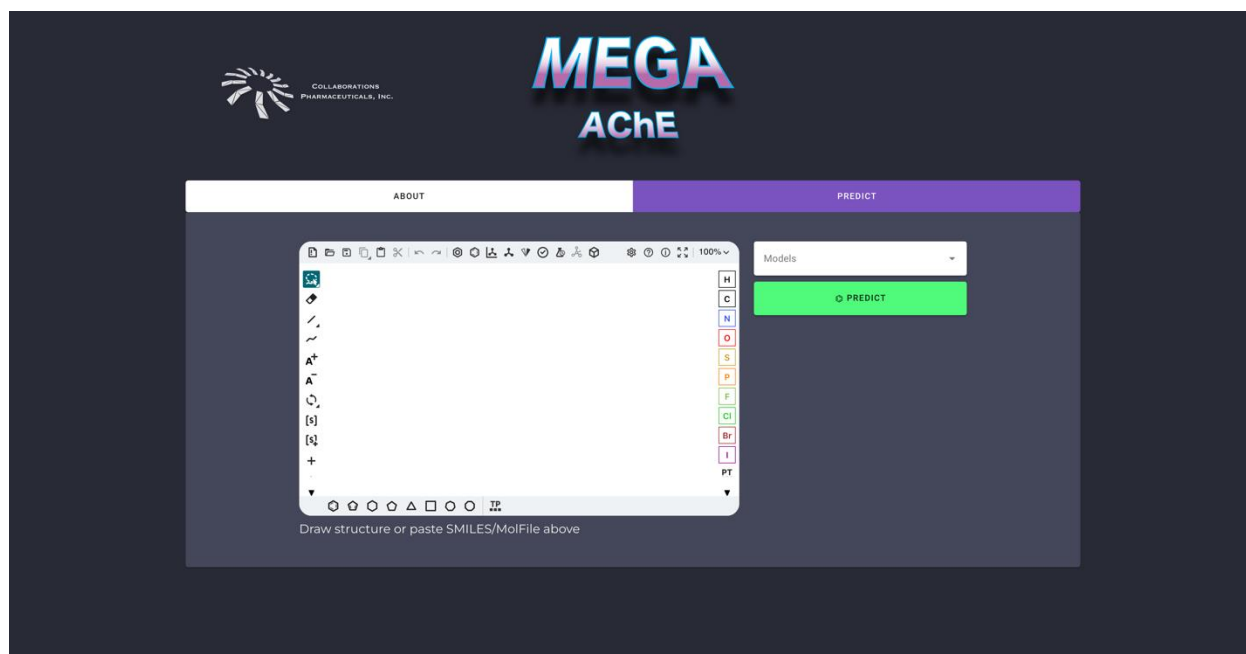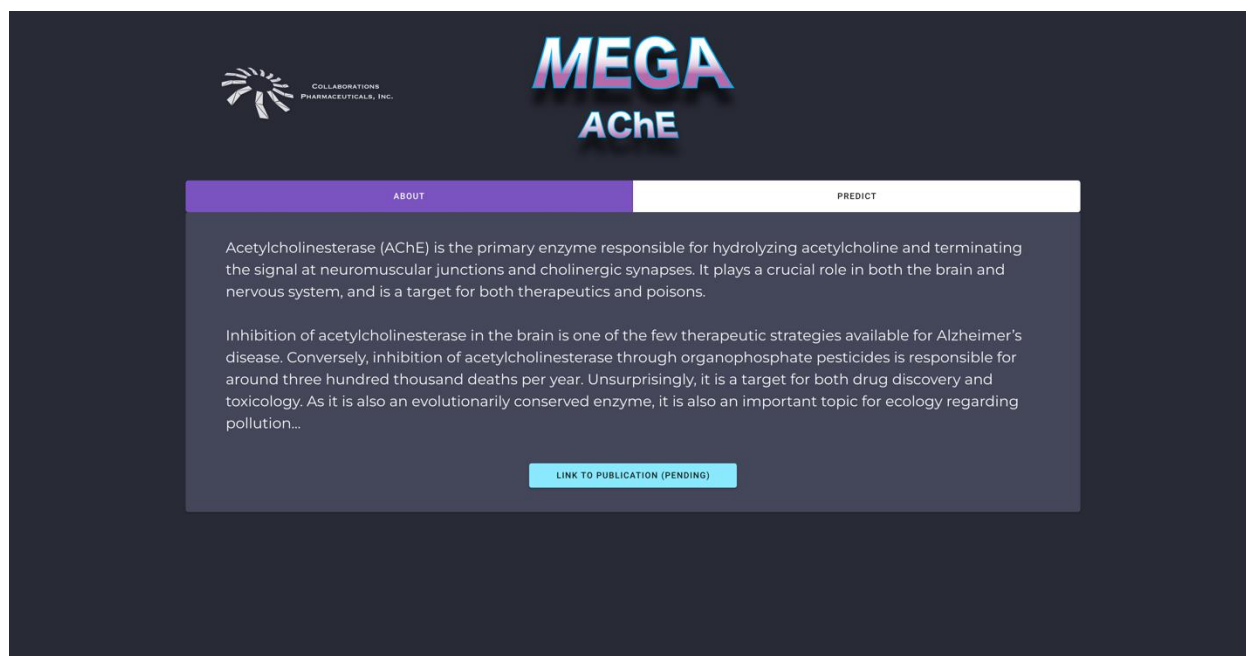

**Figure S6.** MegaAChE website for prediction of AChE in multiple species (megaache.collaborationspharma.com).

**Table S1.** Internal 5-Fold cross validation statistics of Extended Human Classification model and 100  $\mu$ M activity threshold. Human AChE training set: 3560 active/10,382 total compounds.

| Model | AUC  | F1 Score | precision | recall | accuracy | specificity | Cohen's Kappa | MCC  |
|-------|------|----------|-----------|--------|----------|-------------|---------------|------|
| DL*   | 0.95 | 0.83     | 0.91      | 0.76   | 0.89     | 0.96        | 0.75          | 0.76 |
| ADA   | 0.97 | 0.89     | 0.91      | 0.88   | 0.93     | 0.95        | 0.84          | 0.84 |
| BNB   | 0.94 | 0.82     | 0.84      | 0.81   | 0.88     | 0.92        | 0.74          | 0.74 |
| kNN   | 0.98 | 0.94     | 0.94      | 0.95   | 0.96     | 0.97        | 0.91          | 0.91 |
| LREG  | 0.98 | 0.91     | 0.91      | 0.91   | 0.94     | 0.95        | 0.86          | 0.86 |
| RF    | 0.99 | 0.93     | 0.96      | 0.90   | 0.95     | 0.98        | 0.89          | 0.89 |
| SVC   | 0.99 | 0.94     | 0.95      | 0.94   | 0.96     | 0.98        | 0.92          | 0.92 |
| XGB   | 0.99 | 0.93     | 0.94      | 0.93   | 0.95     | 0.97        | 0.90          | 0.90 |

DL = Deep learning; ADA = Adaboosted decision trees; BNB = Bernoulli Naïve Bayes; kNN = K-nearest neighbors; LREG = LogisticRegression; RF = Random forest; SVC = Support vector classification; XGB = XGBoost



**Table S2.** Predicted hits from CompTox libraries against the Extended Human Classification model, sorted by AD score.

| Compound                                               | CAS #       | AD   | Library                 |
|--------------------------------------------------------|-------------|------|-------------------------|
| Benzo(g)quinolin-4-amine, N-(3-(4-morpholinyl)propyl)- | 66667-67-2  | 0.96 | CEC                     |
| Bucricaine                                             | 316-15-4    | 0.95 | CEC                     |
| Despropionyl para-fluorofentanyl                       | 122861-41-0 | 0.95 | CEC/SUSDAT              |
| N'-(1,2,3,4-tetrahydroacridin-9-yl)octane-1,8-diamine  | 249290-19-5 | 0.94 | SUSDAT                  |
| N-(3-(Morpholino)propyl)naphthalen-2-amine             | 93762-06-2  | 0.93 | CEC/CompTox/KEMI/SUSDAT |
| 4-Morpholinepropanamine, N-1-naphthalenyl-             | 5235-82-5   | 0.93 | CEC/SUSDAT              |
| 1-(1-(Phenylmethyl)-4-piperidiny)-1H-benzimidazole     | 84176-75-0  | 0.92 | CEC/KEMI/SUSDAT         |
| NN'-dimethyl-99'-bisacridinium nitrate                 | 2315-97-1   | 0.92 | CEC                     |
| Quindecamine                                           | 19056-26-9  | 0.92 | CEC/KEMI/SUSDAT         |
| 1-Benzyl-N-(2-nitrophenyl)piperidin-4-amine            | 7255-89-2   | 0.90 | CEC/KEMI/SUSDAT         |
| 1-Benzylpiperidine-4-carbaldehyde                      | 22065-85-6  | 0.89 | CEC/KEMI/SUSDAT         |
| (2-Naphthalenyl)perfluorobutanamide                    | 582-00-3    | 0.88 | PFAS                    |
| 2,2,3,3,3-pentafluoro-N-naphthalen-2-ylpropanamide     | 21970-68-3  | 0.88 | PFAS                    |

|                                                                                                                                  |              |      |                         |
|----------------------------------------------------------------------------------------------------------------------------------|--------------|------|-------------------------|
| Mindoperone                                                                                                                      | 52157-83-2   | 0.88 | CEC                     |
| AL 3264                                                                                                                          | 118420-47-6  | 0.88 | CEC                     |
| Mepixanox                                                                                                                        | 17854-59-0   | 0.88 | CEC/KEMI/SUSDAT         |
| Benzamide, N-(2,4-dinitrophenyl)-4-nitro-                                                                                        | 37632-91-0   | 0.88 | CEC/CompTox/KEMI/SUSDAT |
| 2-Methylacridine-9-carbaldehyde                                                                                                  | 70401-29-5   | 0.88 | CEC/SUSDAT              |
| Buterizine                                                                                                                       | 68741-18-4   | 0.87 | CEC                     |
| Picumast                                                                                                                         | 39577-19-0   | 0.87 | CEC                     |
| 9-Acridinamine, N-(4-(4-ethyl-1-piperazinyl)phenyl)-                                                                             | 143069-08-3  | 0.87 | CEC                     |
| Lauralkonium chloride                                                                                                            | 19486-61-4   | 0.87 | CEC                     |
| 1,3-Propanediamine, N'-benzo(g)quinolin-4-yl-N,N-diethyl-                                                                        | 56297-68-8   | 0.87 | CEC                     |
| Riboflavin                                                                                                                       | 83-88-5      | 0.87 | CEC/CompTox/KEMI/SUSDAT |
| Serdemetan                                                                                                                       | 881202-45-5  | 0.86 | SUSDAT                  |
| 3-(2-{(2-Methoxyphenyl)methyl}amino)ethyl)quinazoline-2,4(1H,3H)-dione                                                           | 1028307-48-3 | 0.86 | CEC/SUSDAT              |
| 7-(β-D-galactopyranosyloxy)-2-oxo-N-[3-(2367-tetrahydro-13-dimethyl-26-dioxo-1H-purin-8-yl)propyl]-2H-1-benzopyran-3-carboxamide | 79181-90-1   | 0.86 | CEC                     |
| 2-[(1-benzyl-4-piperidyl)amino]butyronitrile                                                                                     | 84196-14-5   | 0.86 | CEC                     |
| 12-Oxospirostan-3-yl acetate                                                                                                     | 915-35-5     | 0.86 | CEC/SUSDAT              |

|                                                                                                    |             |      |                         |
|----------------------------------------------------------------------------------------------------|-------------|------|-------------------------|
| Bis(1,3)benzodioxolo(5,6-a:4',5'-g)quinolizinium, 6,7-dihydro-13-methyl-                           | 30243-28-8  | 0.86 | SUSDAT                  |
| Cinepaxadil                                                                                        | 69118-25-8  | 0.86 | CEC                     |
| E 5880                                                                                             | 128420-61-1 | 0.86 | CEC                     |
| 6-chloro-9-[[3-[(2-chloroethyl)amino]propyl]amino]-2-methoxyacridine dihydrochloride               | 17070-45-0  | 0.86 | CEC/SUSDAT              |
| Diaminoanthra[912-cde]benzo[rst]pentaphene-510-dione                                               | 58019-27-5  | 0.86 | CEC                     |
| 2-({[2-(2,5-Dimethoxyphenyl)ethyl]amino}methyl)phenol                                              | 919797-17-4 | 0.86 | CompTox/SUSDAT          |
| N-(2-(6-Methoxy-1-methyl-9H-carbazol-2-yl)ethyl)-N-methylacetamide                                 | 93841-60-2  | 0.86 | CEC/KEMI/SUSDAT         |
| 2,3,4,9-Tetrahydro-6-methoxy-1H-pyrido(3,4-b)indol-1-one                                           | 17952-87-3  | 0.85 | CEC/KEMI/SUSDAT         |
| moxicoumone                                                                                        | 17692-56-7  | 0.85 | CEC                     |
| Ilmofosine                                                                                         | 83519-04-4  | 0.85 | CEC                     |
| 1-Benzyl-4-((4-fluorophenyl)amino)piperidine-4-carbonitrile                                        | 61085-37-8  | 0.85 | CEC/SUSDAT              |
| 1-Benzyl-4-((4-chlorophenyl)amino)piperidine-4-carbonitrile                                        | 972-20-3    | 0.85 | CEC/SUSDAT              |
| EINECS 288-151-0                                                                                   | 85665-61-8  | 0.85 | CEC/CompTox/SUSDAT      |
| N,N'-Bis(2-(((5-((dimethylamino)methyl)furan-2-yl)methyl)sulfanyl)ethyl)-2-nitroethene-1,1-diamine | 72126-78-4  | 0.85 | SUSDAT                  |
| Atevirdine                                                                                         | 136816-75-6 | 0.85 | CEC                     |
| Oxypertine                                                                                         | 153-87-7    | 0.85 | CEC/CompTox/KEMI/SUSDAT |

|                                                                            |             |      |                         |
|----------------------------------------------------------------------------|-------------|------|-------------------------|
| Teoprolol                                                                  | 65184-10-3  | 0.85 | CEC                     |
| 4-Acridinecarboxamide, 9-amino-N-(3-(dimethylamino)propyl)-                | 89459-44-9  | 0.85 | CompTox/SUSDAT          |
| 2-(1H-Benzimidazol-2-yl)aniline                                            | 5805-39-0   | 0.85 | CEC/CompTox/KEMI/SUSDAT |
| Benzene-1,4-diamine, N-(benzo(g)quinolin-4-yl)-N'-(2-(diethylamino)ethyl)- | 127136-27-0 | 0.85 | CEC                     |
| Bisdequalinium                                                             | 16776-40-2  | 0.85 | CEC                     |
| N-Stearylbenzylamine                                                       | 20198-87-2  | 0.85 | CEC/KEMI/SUSDAT         |
| N-Dodecylbenzylamine hydrochloride                                         | 2090-62-2   | 0.85 | CEC/SUSDAT              |
| 6-Benzyl-2-thiouracil                                                      | 6336-50-1   | 0.85 | CompTox/SUSDAT          |
| N-(1-(Benzyl)-4-piperidyl)benzamide                                        | 971-34-6    | 0.85 | CEC/SUSDAT              |
| Indalpine                                                                  | 63758-79-2  | 0.84 | CEC/KEMI/SUSDAT         |
| N-(2-(6-Methoxy-1-methyl-9H-carbazol-2-yl)ethyl)-N-(phenylmethyl)acetamide | 93841-55-5  | 0.84 | CEC/KEMI/SUSDAT         |
| 1-Benzyl-4-(m-toluidino)piperidine-4-carbonitrile                          | 972-18-9    | 0.84 | CEC/SUSDAT              |
| 1-Benzyl-4-(p-toluidino)piperidine-4-carbonitrile                          | 972-19-0    | 0.84 | CEC/SUSDAT              |
| 1-Benzylpyrrolidine                                                        | 29897-82-3  | 0.84 | CEC/KEMI/SUSDAT         |
| 4-Piperidinecarboxaldehyde, 1-benzyl-4-phenyl-                             | 26979-21-5  | 0.84 | CEC/SUSDAT              |
| 1H-Imidazole-4-carbaldehyde                                                | 3034-50-2   | 0.84 | KEMI                    |
| Acridine ethidium heterodimer                                              | 68942-32-5  | 0.84 | CEC/SUSDAT              |

|                                                                                                  |             |      |                 |
|--------------------------------------------------------------------------------------------------|-------------|------|-----------------|
| 3-benzyl-1-decyl-4,5-dihydro-1H-imidazolium chloride                                             | 94088-59-2  | 0.84 | CEC             |
| Aminoquinol                                                                                      | 10023-54-8  | 0.84 | CEC             |
| 2-[p-(dimethylamino)styryl]-1-methylpyridinium iodide                                            | 2156-29-8   | 0.83 | CEC/SUSDAT      |
| 1-Benzylpiperidine                                                                               | 2905-56-8   | 0.86 | CEC/KEMI/SUSDAT |
| 1-{benzyl[2-(2-methoxyphenoxy)ethyl]amino}-3-(9H-carbazol-4-yloxy)propan-2-ol                    | 72955-94-3  | 0.83 | CEC             |
| 3-[4-(4-Phenyl-3,4-dihydropyridin-1(2H)-yl)butyl]-1H-indole--hydrogen chloride                   | 73966-59-3  | 0.83 | CEC/SUSDAT      |
| Disodium 6-amino-3-[(4-chloro-5-methyl-2-sulphonatophenyl)azo]-4-hydroxynaphthalene-2-sulphonate | 68227-39-4  | 0.83 | CEC             |
| Amopyroquine                                                                                     | 550-81-2    | 0.82 | CEC/SUSDAT      |
| milipertine                                                                                      | 24360-55-2  | 0.82 | CEC             |
| K201 free base                                                                                   | 145903-06-6 | 0.82 | SUSDAT          |
| 1-Benzyl-4-(propylamino)piperidine-4-carbonitrile                                                | 3560-07-40  | 0.82 | SUSDAT          |
| N~2~-(1-Benzylpiperidin-4-yl)butane-1,2-diamine                                                  | 84196-18-9  | 0.82 | SUSDAT          |
| ELBANIZINE                                                                                       | 110629-41-9 | 0.82 | CEC             |
| oxiramide                                                                                        | 13958-40-2  | 0.82 | CEC             |
| 1-(2-(4-Methoxyphenyl)ethyl)piperidin-4-amine                                                    | 85098-70-0  | 0.82 | CEC/KEMI/SUSDAT |
| 2-Methoxy-6-chloro-9-[3-[ethyl(2-chloroethyl)amino]propylamino]acridine dihydrochloride          | 146-59-8    | 0.82 | CEC/SUSDAT      |

|                                                                                               |             |      |                         |
|-----------------------------------------------------------------------------------------------|-------------|------|-------------------------|
| moxipraquine                                                                                  | 23790-08-1  | 0.82 | CEC                     |
| N1N1-bis(2-chloroethyl)-N4-(6-chloro-2-methoxyacridin-9-yl)pentane-14-diamine dihydrochloride | 4213-45-0   | 0.82 | CEC                     |
| Coumermycin A1                                                                                | 4434-05-3   | 0.82 | 0.82                    |
| N,N-Bis(2-chloroethyl)-4-[(6-chloro-2-methoxyacridin-9(10H)-ylidene)amino]pentan-1-amine      | 64046-79-3  | 0.82 | SUSDAT                  |
| N-Cyclohexyl-1H-indole-3-methylamine                                                          | 53924-03-1  | 0.82 | CEC/CompTox/KEMI/SUSDAT |
| cloxacepride                                                                                  | 65569-29-1  | 0.82 | CEC                     |
| C.I. Direct Orange 74                                                                         | 6104-56-9   | 0.82 | SUSDAT                  |
| Dalbavancin                                                                                   | 171500-79-1 | 0.81 | CEC                     |
| Barmastine                                                                                    | 99156-66-8  | 0.81 | CEC                     |
| 4-{[4-(Diphenylmethyl)piperazin-1-yl]methyl}-N-ethyl-2-nitroaniline                           | 68740-16-9  | 0.81 | CEC/SUSDAT              |
| Acridine, 9,9'-ethylenediiminobis-                                                            | 58903-56-3  | 0.81 | CEC                     |
| morocromen                                                                                    | 35843-07-3  | 0.81 | CEC                     |
| 2,3,4,9-tetrahydro-1H-pyrido[3,4-b]indol-1-one                                                | 17952-82-8  | 0.81 | CEC/KEMI                |
| viqualine                                                                                     | 72714-74-0  | 0.81 | CEC                     |
| 4-[3-(3-Ethenylpiperidin-4-yl)propyl]-6-methoxyquinoline--hydrogen chloride (1/1)             | 79626-11-2  | 0.81 | SUSDAT                  |

|                                                                                                                              |             |      |                     |
|------------------------------------------------------------------------------------------------------------------------------|-------------|------|---------------------|
| 3-Benzyl-3-azaspiro(5.5)undecane hydrochloride                                                                               | 1085-84-3   | 0.81 | CEC/SUSDAT          |
| 1H-Pyrido(3,4-b)indol-1-one, 2,3,4,9-tetrahydro-6-chloro-                                                                    | 17952-83-9  | 0.81 | CEC/KEMI/SUSDAT     |
| HOE 33342                                                                                                                    | 23491-52-3  | 0.81 | CEC/KEMI/SUSDAT     |
| Carvedilol Phosphate                                                                                                         | 610309-89-2 | 0.81 | CEC                 |
| Carvedilol                                                                                                                   | 72956-09-3  | 0.81 | CompTox/KEMI/SUSDAT |
| 2-[acetyl(4-dodecylphenyl)amino]-4-[[4-methoxy-3-[[3-(4-methoxyphenyl)-1,3-dioxopropyl]amino]phenyl]amino]-4-oxobutyric acid | 17304-65-3  | 0.81 | CEC                 |
| 2-Deoxycytidine-5-Triphosphate                                                                                               | 2056-98-6   | 0.81 | CEC                 |
| 2-deoxycytidine diphosphate                                                                                                  | 800-73-7    | 0.81 | CEC                 |
| MDL 62873                                                                                                                    | 122173-74-4 | 0.80 | CEC                 |
| 1'-Benzylspiro(isoquinoline-1(2H),4'-piperidine)-3(4H)-one hydrochloride                                                     | 15198-52-4  | 0.80 | SUSDAT              |
| 5-Chloro-3-ethyl-N-[2-[4-(1-piperidinyl)phenyl]ethyl]-1H-indole-2-carboxamide                                                | 868273-06-7 | 0.80 | SUSDAT              |
| N-(3-(3-((4-Chloro-2,5-dimethoxyphenyl)amino)-1,3-dioxopropyl)phenyl)-N2-(2-methylpropionyl)-N2-octadecyl-L-asparagine       | 31522-23-3  | 0.80 | CEC/KEMI/SUSDAT     |
| lyfarizine                                                                                                                   | 119514-66-8 | 0.80 | CEC                 |
| Pyridinium, 1-[2-[[4-[2-(2,6-dichloro-4-nitrophenyl)diazanyl]phenyl]ethylamino]ethyl]-, sulfate (1:1)                        | 64086-81-3  | 0.80 | SUSDAT              |
| 4-((2,3-Dihydro-5-benzofuranyl)methyl)piperazine-1-carbaldehyde                                                              | 85392-07-0  | 0.80 | CEC/KEMI/SUSDAT     |

|                                                                                                                                                                                                                                                     |            |      |                 |
|-----------------------------------------------------------------------------------------------------------------------------------------------------------------------------------------------------------------------------------------------------|------------|------|-----------------|
| ITROCAINIDE                                                                                                                                                                                                                                         | 90828-99-2 | 0.80 | CEC             |
| 1-Benzyl-4-(butylamino)piperidine-4-carbonitrile                                                                                                                                                                                                    | 963-08-6   | 0.80 | CEC/KEMI/SUSDAT |
| 1-Benzyl-4-(2-methylanilino)piperidine-4-carbonitrile                                                                                                                                                                                               | 972-17-8   | 0.80 | CEC/SUSDAT      |
| CEC = Human Biomonitoring for Europe Chemicals of Emerging Concern Screen list; CompTox = Compilation of 49 lists from the EPA CompTox Chemicals Dashboard; KEMI = KEMI (Swedish Chemicals Agency) Market List; SUSDAT = Merged NORMAN Suspect List |            |      |                 |
